# Supplementary material
Source: PubMed Central journal article supplement (PMC2669348)
Supplement: 0813221106_0813221106SI.pdf [file 0813221106_0813221106SI.pdf]

# Supporting Information

Rodilla et al. 10.1073/pnas.0813221106

## SI Methods

**Colony Formation in Soft Agar.** For anchorage-independent growth,  $10^4$  cells were resuspended in 1.5 mL of growth medium containing 0.4% agarose and plated on 6-cm plates on a solidified bottom layer made of 0.6% agarose in medium. 50  $\mu$ L of growth medium was added daily. Colonies were counted after 20 days and imaged at 100x magnification. Each experiment was performed in duplicates.

**Cell Fractionation.** Nuclei were isolated in 0.1% Nonidet P-40/PBS for 5min on ice, followed by centrifugation at 720g, washed twice with PBS and lysed for 30min in 50 mM Tris·HCl (pH7.5), 150 mM NaCl, 1% Nonidet P-40, 5 mM EGTA, 5 mM EDTA, 20 mM NaF, and complete protease inhibitor mixture (Roche). The supernatant was the cytoplasmic fraction.

**Microarrays.** Total RNA was isolated from Ls174T/dnTCF4 cells with different treatments: DMSO, DAPT, doxycycline, DAPT plus doxycycline, using RNA extraction kit (Qiagen). Samples

were labeled with Cy3 and Cy5 by cDNA synthesis with Agilent low RNA input fluorescent linear amplification kits. Samples were hybridized on Whole Human Genome Oligo Microarrays (G4122A). Raw data were processed using a web implementation of Limma (1) and normalized by robust correction using the global lowess algorithm with scaling (2). For determining significant hits, the Significance Analysis of Microarray (SAM) statistic was performed with the normalized log<sub>2</sub> ratios of the 2 replicate microarray hybridizations, using one class and 2 class unpaired tests for the standard *t* test, running on the R based implementation of SAM (samr) (3) on a web based implementation (SAMi) (Lozano et al., unpublished data).

**Functional Enrichment Analysis.** Functional annotation of genes based on Gene Ontology (4) were extracted from Ensembl v.47 (5). *Z* score analysis:  $Z_x = (X - \mu_x) / \sigma_x$  (where  $\mu_x$  = mean,  $\sigma_x$  = standard error). We display matrices of *Z* score values in which each cell is represented by a color-coded scale. Significance levels were corrected for multiple comparisons using false discovery rate (FDR) correction.

1. Smyth GK, Michaud J, Scott HS (2005) Use of within-array replicate spots for assessing differential expression in microarray experiments. *Bioinformatics* 21:2067–2075.
2. Smyth GK, Speed T (2003) Normalization of cDNA microarray data. *Methods* 31:265–273.
3. Tusher VG, Tibshirani R, Chu G (2001) Significance analysis of microarrays applied to the ionizing radiation response. *Proc Natl Acad Sci USA* 98:5116–5121.
4. Consortium GO (2006) The Gene Ontology (GO) project in 2006. *Nucleic Acids Res* 34:D322–D326.
5. Hubbard TJ, et al. (2007) Ensembl 2007. *Nucleic Acids Res* 35:D610–D617.

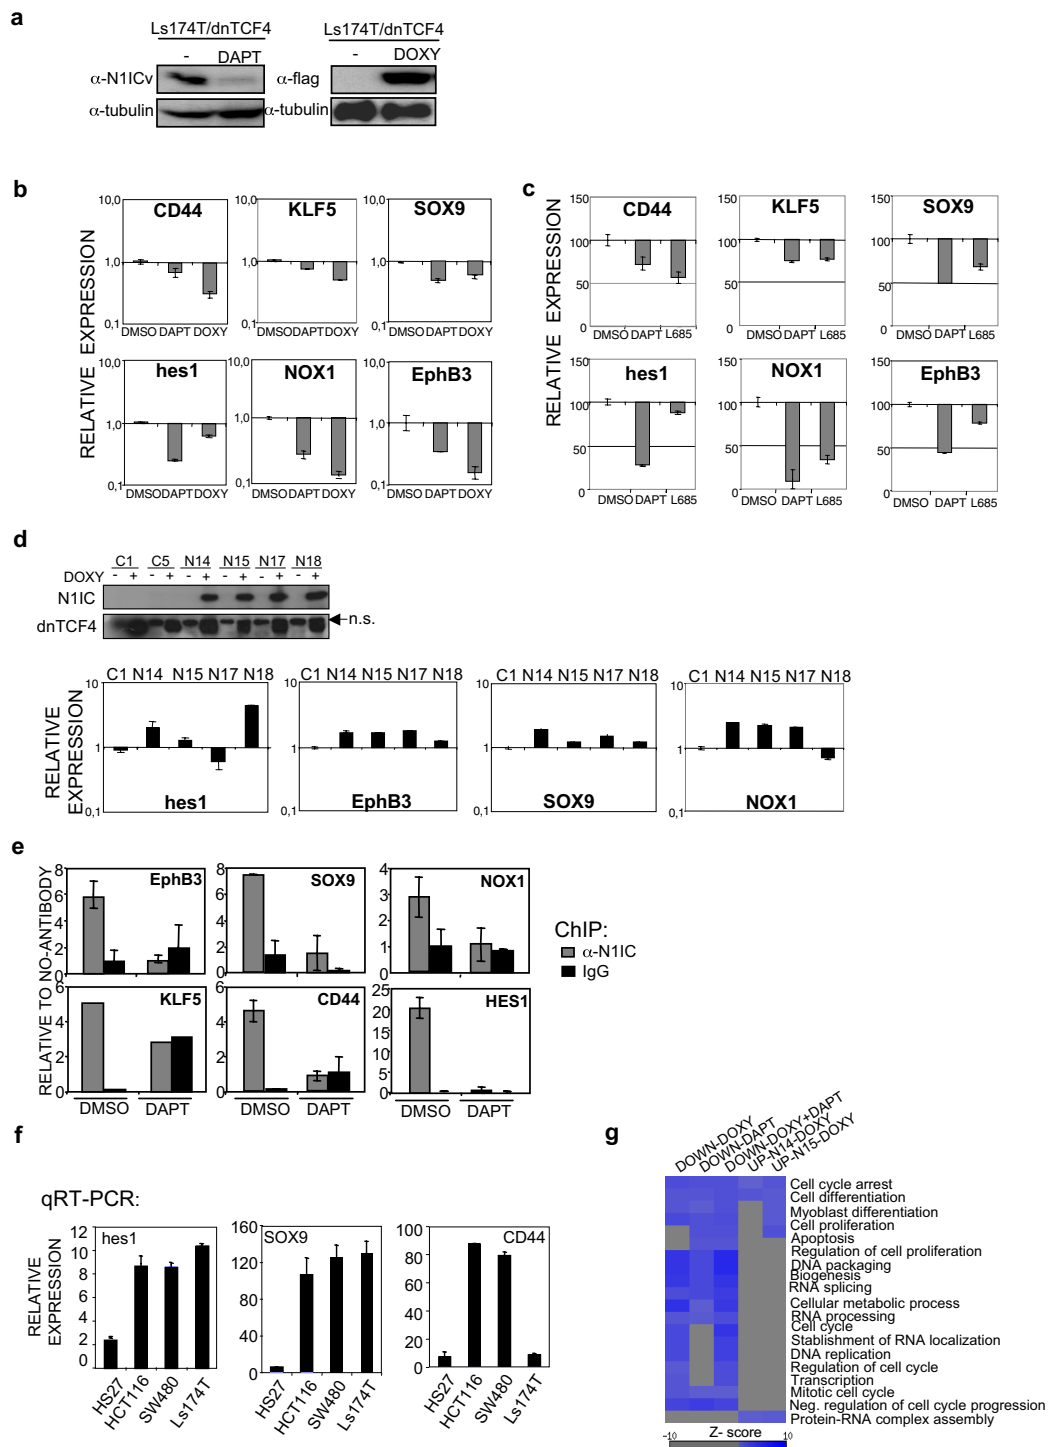

**Fig. S1.** (a) Down-regulation of Notch and  $\beta$ -catenin activities in response to DAPT and doxycycline treatments respectively. Western blot of Ls174T/dnTCF4 cells showing the blockage of Notch1 activation by DAPT (50  $\mu$ M) and the expression levels of inducible dnTCF4 after doxycycline treatment in the conditions used for the microarray experiments in Fig. 1a. (b) Confirmation by qRT-PCR of different genes identified in the microarray screening from Fig. 1a. (c) Inhibition of different genes identified in the microarray screening with 2 different Notch inhibitors (DAPT and L685,458). (d) Confirmation by qRT-PCR of different genes identified in the microarray screening from Fig. 1b. (Upper) The inducible expression of N1IC and dnTCF4 by Western blot. (e) ChIP with anti-cleaved Notch antibody and qPCR analysis on the indicated promoters in Ls174T cells untreated or treated with DAPT. (f) (Upper) ChIP with the  $\alpha$ -Notch1 antibody and qPCR analysis of the indicated promoters in different CRC cell lines. (Lower) Expression levels of these genes determined by qRT-PCR. (g) Functional annotation of genes down-regulated after inhibition of Wnt, Notch or both pathways or up-regulated in 2 N1IC-expressing clones (N14 and N15) based on Gene Ontology. Blue signifies over-representation of genes for the indicated groups. Gray means no significant difference from expected.





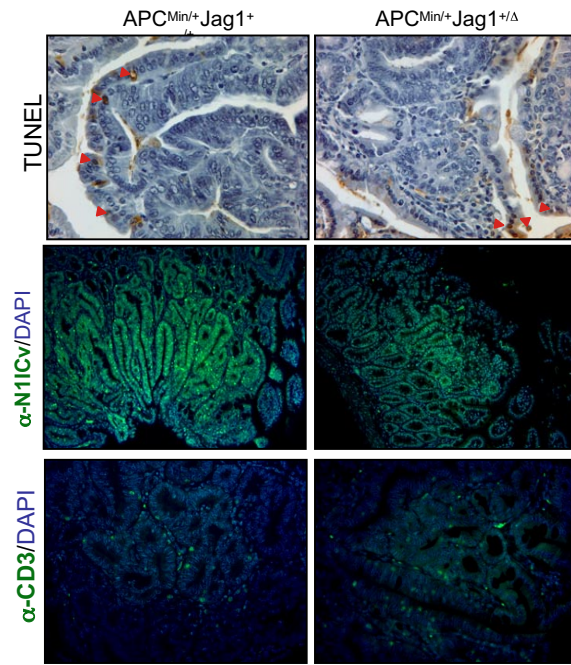

**Fig. S4.** TUNEL assay of representative tumors from different genotypes. Red arrows indicate apoptotic cells. Immunostaining with  $\alpha$ -cleaved Notch1 (*Upper*) and  $\alpha$ -CD3 (*Lower*) antibodies of representative tumors from APC<sup>Min/+</sup> or APC<sup>Min/+</sup>Jag1<sup>+/-Δ</sup> mice. Representative images were obtained in an Olympus IX-10 at 200X.
