# Supplementary material
Source: PubMed Central journal article supplement (PMC2669348)
Supplement: 0813221106_ST1_PDF.pdf [file 0813221106_ST1_PDF.pdf]

**TABLE S1.** List of genes selected from the microarray screening that showed a minimum of 1.3 fold downregulation in both conditions: doxycycline and DAPT treatment

| NAME       | GENE SYMBOL   | DOXY I | DOXY II | DAPT I | DAPT II | AVERAGE DOXY | AVERAGE DAPT |
|------------|---------------|--------|---------|--------|---------|--------------|--------------|
| NM_005318  | H1FO          | -2,12  | -2,15   | -3,94  | -2,80   | -2,13        | -3,37        |
| NM_005524  | HES1          | -1,36  | -1,25   | -2,90  | -3,79   | -1,31        | -3,34        |
| NM_017534  | MYH2          | -2,06  | -2,73   | -2,35  | -3,86   | -2,40        | -3,11        |
| BC006322   | ATF3          | -1,36  | -1,90   | -2,09  | -3,91   | -1,63        | -3,00        |
| NM_005801  | SUI1          | -2,75  | -1,41   | -3,70  | -2,25   | -2,08        | -2,97        |
| NM_006979  | SLC39A7       | -1,84  | -2,10   | -2,85  | -2,79   | -1,97        | -2,82        |
| NM_016639  | TNFRSF12A     | -1,58  | -1,55   | -2,90  | -2,59   | -1,57        | -2,75        |
| NM_033260  | FOXQ1         | -1,50  | -1,65   | -2,08  | -3,12   | -1,58        | -2,60        |
| NM_006472  | TXNIP         | -1,61  | -2,15   | -1,94  | -3,25   | -1,88        | -2,60        |
| NM_024016  | HOXB8         | -2,10  | -2,80   | -1,99  | -3,09   | -2,45        | -2,54        |
| NM_003531  | HIST1H3C      | -1,58  | -1,91   | -2,15  | -2,87   | -1,75        | -2,51        |
| NM_021005  | NR2F2         | -1,91  | -2,10   | -2,04  | -2,91   | -2,01        | -2,48        |
| NM_005324  | H3F3B         | -1,62  | -2,39   | -1,97  | -2,98   | -2,00        | -2,47        |
| NM_005410  | SEPP1         | -2,01  | -1,10   | -2,98  | -1,90   | -1,56        | -2,44        |
| NM_014330  | PPP1R15A      | -1,75  | -1,44   | -2,71  | -2,11   | -1,59        | -2,41        |
| NM_001511  | CXCL1         | -2,97  | -3,17   | -2,01  | -2,79   | -3,07        | -2,40        |
| NM_003537  | HIST1H3B      | -1,53  | -1,84   | -1,98  | -2,72   | -1,68        | -2,35        |
| NM_016947  | C6orf48       | -1,72  | -1,48   | -2,47  | -2,20   | -1,60        | -2,33        |
| NM_005384  | NFIL3         | -1,12  | -1,48   | -1,56  | -3,06   | -1,30        | -2,31        |
| NM_052966  | C1orf24       | -1,45  | -1,81   | -2,04  | -2,58   | -1,63        | -2,31        |
| AB037851   | KIAA1430      | -3,59  | -1,47   | -3,30  | -1,32   | -2,53        | -2,31        |
| NM_021158  | TRIB3         | -1,73  | -1,01   | -2,35  | -2,27   | -1,37        | -2,31        |
| NM_005194  | CEBPB         | -1,74  | -1,44   | -2,38  | -2,22   | -1,59        | -2,30        |
| NM_003533  | HIST1H3I      | -1,49  | -1,69   | -2,15  | -2,44   | -1,59        | -2,30        |
| NM_021059  | H3/o          | -1,37  | -1,80   | -1,88  | -2,69   | -1,59        | -2,28        |
| NM_002089  | CXCL2         | -1,64  | -2,15   | -1,75  | -2,78   | -1,89        | -2,26        |
| NM_003729  | RTCD1         | -1,53  | -1,99   | -1,71  | -2,81   | -1,76        | -2,26        |
| NM_005564  | LCN2          | -1,54  | -1,59   | -2,27  | -2,24   | -1,57        | -2,25        |
| NM_003544  | HIST1H4B      | -2,50  | -2,76   | -1,68  | -2,78   | -2,63        | -2,23        |
| AK027341   | KIAA1856      | -2,30  | -1,78   | -2,25  | -2,20   | -2,04        | -2,22        |
| NM_053000  | TIGA1         | -1,82  | -1,99   | -1,92  | -2,51   | -1,91        | -2,21        |
| BC034962   | 15E1.2        | -2,89  | -1,86   | -2,57  | -1,77   | -2,37        | -2,17        |
| NM_181803  | UBE2C         | -1,59  | -1,01   | -2,32  | -1,97   | -1,30        | -2,15        |
| BC017665   | CXorf39       | -2,64  | -1,75   | -2,60  | -1,69   | -2,19        | -2,14        |
| NM_003542  | HIST1H4C      | -2,92  | -2,79   | -1,86  | -2,41   | -2,86        | -2,14        |
| NM_003546  | HIST1H4L      | -2,47  | -2,95   | -1,60  | -2,64   | -2,71        | -2,12        |
| NM_003534  | HIST1H3G      | -1,40  | -1,66   | -1,90  | -2,32   | -1,53        | -2,11        |
| NM_006101  | KNTC2         | -1,61  | -2,00   | -1,66  | -2,50   | -1,81        | -2,08        |
| NM_000584  | IL8           | -1,81  | -1,97   | -2,10  | -2,04   | -1,89        | -2,07        |
| AL833872   | DKFZp761P0423 | -1,55  | -1,83   | -1,63  | -2,49   | -1,69        | -2,06        |
| NM_002520  | NPM1          | -2,40  | -1,32   | -2,84  | -1,22   | -1,86        | -2,03        |
| NM_003122  | SPINK1        | -1,71  | -1,64   | -1,74  | -2,32   | -1,67        | -2,03        |
| AB051487   | DUSP16        | -1,54  | -1,90   | -1,53  | -2,48   | -1,72        | -2,01        |
| NM_006948  | STCH          | -1,28  | -1,72   | -1,41  | -2,59   | -1,50        | -2,00        |
| NM_004902  | RNPC2         | -1,52  | -1,33   | -1,71  | -2,28   | -1,42        | -1,99        |
| NM_021144  | PSIP1         | -2,38  | -2,27   | -2,09  | -1,90   | -2,32        | -1,99        |
| NM_003539  | HIST1H4D      | -2,32  | -2,73   | -1,51  | -2,45   | -2,53        | -1,98        |
| NM_022893  | BCL11A        | -2,53  | -2,04   | -2,08  | -1,88   | -2,29        | -1,98        |
| L13689     | PCGF4         | -1,69  | -2,25   | -1,58  | -2,36   | -1,97        | -1,97        |
| NM_153631  | HOXA3         | -1,79  | -1,74   | -1,89  | -2,02   | -1,77        | -1,95        |
| THC1854890 | LOC400782     | -1,33  | -1,38   | -1,65  | -2,25   | -1,36        | -1,95        |

|           |              |       |       |       |       |       |       |
|-----------|--------------|-------|-------|-------|-------|-------|-------|
| NM_006756 | TCEA1        | -1,45 | -1,65 | -1,61 | -2,29 | -1,55 | -1,95 |
| NM_014685 | HERPUD1      | -1,82 | -1,47 | -1,95 | -1,94 | -1,64 | -1,95 |
| NM_000346 | SOX9         | -2,23 | -2,42 | -1,91 | -1,98 | -2,32 | -1,94 |
| NM_152626 | ZNF92        | -1,15 | -1,47 | -1,32 | -2,56 | -1,31 | -1,94 |
| NM_005719 | ARPC3        | -1,52 | -1,92 | -1,49 | -2,37 | -1,72 | -1,93 |
| NM_018420 | SLC22A15     | -1,45 | -1,73 | -1,54 | -2,28 | -1,59 | -1,91 |
| NM_003211 | TDG          | -1,38 | -1,34 | -2,46 | -1,36 | -1,36 | -1,91 |
| NM_016628 | WAC          | -1,31 | -1,46 | -1,75 | -2,04 | -1,39 | -1,90 |
| XM_066695 | LOC139431    | -1,61 | -1,62 | -1,91 | -1,88 | -1,61 | -1,90 |
| NM_001016 | RPS12        | -2,42 | -1,23 | -2,48 | -1,31 | -1,82 | -1,89 |
| NM_016201 | AMOTL2       | -2,34 | -3,05 | -1,31 | -2,47 | -2,70 | -1,89 |
| AY070137  | SP3          | -1,56 | -1,69 | -1,65 | -2,12 | -1,63 | -1,89 |
| AB028948  | THRAP2       | -1,45 | -1,31 | -1,91 | -1,85 | -1,38 | -1,88 |
| NM_006275 | SFRS6        | -3,96 | -2,66 | -2,43 | -1,33 | -3,31 | -1,88 |
| AL137671  | SET          | -1,87 | -1,85 | -1,79 | -1,96 | -1,86 | -1,88 |
| NM_016315 | GULP1        | -1,66 | -1,34 | -2,03 | -1,69 | -1,50 | -1,86 |
| NM_002928 | RGS16        | -2,79 | -2,99 | -1,54 | -2,12 | -2,89 | -1,83 |
| NM_001003 | RPLP1        | -3,31 | -1,18 | -2,66 | -1,00 | -2,25 | -1,83 |
| NM_018976 | SLC38A2      | -1,89 | -1,61 | -1,95 | -1,70 | -1,75 | -1,82 |
| NM_004152 | OAZ1         | -1,95 | -1,03 | -2,37 | -1,23 | -1,49 | -1,80 |
| NM_018237 | CCAR1        | -1,14 | -1,49 | -1,32 | -2,29 | -1,32 | -1,80 |
| NM_012248 | SEPHS2       | -1,53 | -1,50 | -1,79 | -1,81 | -1,51 | -1,80 |
| AL833530  | NFE2L1       | -1,40 | -1,36 | -1,63 | -1,96 | -1,38 | -1,79 |
| BC001373  | MESDC1       | -1,52 | -1,08 | -2,03 | -1,55 | -1,30 | -1,79 |
| NM_003368 | USP1         | -1,36 | -1,85 | -1,31 | -2,27 | -1,60 | -1,79 |
| NM_001023 | RPS20        | -1,78 | -1,12 | -2,35 | -1,22 | -1,45 | -1,78 |
| NM_006516 | SLC2A1       | -1,13 | -1,71 | -1,21 | -2,36 | -1,42 | -1,78 |
| NM_004064 | CDKN1B       | -1,44 | -1,96 | -1,31 | -2,23 | -1,70 | -1,77 |
| NM_016626 | RKHD2        | -1,53 | -1,53 | -1,63 | -1,90 | -1,53 | -1,77 |
| NM_001677 | ATP1B1       | -3,35 | -3,17 | -2,42 | -1,10 | -3,26 | -1,76 |
| NM_152437 | ZFOC1        | -1,66 | -2,10 | -1,52 | -2,00 | -1,88 | -1,76 |
| NM_014267 | SMAP         | -1,46 | -1,89 | -1,50 | -2,02 | -1,68 | -1,76 |
| NM_005842 | SPRY2        | -1,64 | -1,92 | -1,56 | -1,95 | -1,78 | -1,76 |
| NM_080820 | HARS2        | -1,76 | -2,00 | -1,56 | -1,94 | -1,88 | -1,75 |
| AK024274  | SCYL2        | -1,21 | -1,59 | -1,30 | -2,20 | -1,40 | -1,75 |
| NM_001031 | RPS28        | -2,42 | -1,18 | -2,42 | -1,07 | -1,80 | -1,75 |
| NM_016106 | SCFD1        | -1,32 | -1,84 | -1,23 | -2,25 | -1,58 | -1,74 |
| AK027632  | DKFZp564K142 | -1,34 | -1,59 | -1,47 | -2,00 | -1,46 | -1,74 |
| NM_001730 | KLF5         | -1,52 | -1,76 | -1,56 | -1,90 | -1,64 | -1,73 |
| NM_024921 | POF1B        | -1,57 | -1,46 | -1,72 | -1,74 | -1,51 | -1,73 |
| NM_002140 | HNRPK        | -2,01 | -2,25 | -1,62 | -1,84 | -2,13 | -1,73 |
| NM_003257 | TJP1         | -1,30 | -1,58 | -1,42 | -2,04 | -1,44 | -1,73 |
| NM_203472 | SELS         | -1,33 | -1,32 | -1,80 | -1,64 | -1,32 | -1,72 |
| NM_022074 | FLJ22794     | -1,48 | -1,98 | -1,29 | -2,15 | -1,73 | -1,72 |
| NM_006305 | ANP32A       | -2,00 | -1,59 | -2,11 | -1,32 | -1,80 | -1,72 |
| NM_018715 | TD-60        | -1,56 | -1,50 | -1,81 | -1,63 | -1,53 | -1,72 |
| NM_024640 | YRDC         | -1,37 | -1,53 | -1,56 | -1,87 | -1,45 | -1,72 |
| BC044649  | ATP11A       | -1,79 | -1,83 | -1,43 | -2,00 | -1,81 | -1,72 |
| AK026132  | PHF17        | -1,73 | -1,92 | -1,38 | -2,05 | -1,83 | -1,72 |
| NM_014028 | OSTM1        | -1,43 | -1,28 | -1,72 | -1,70 | -1,36 | -1,71 |
| NM_170715 | RASSF1       | -1,50 | -1,71 | -1,57 | -1,85 | -1,61 | -1,71 |
| AK056046  | C18orf43     | -1,51 | -1,76 | -1,34 | -2,08 | -1,64 | -1,71 |
| BC028704  | ARRDC4       | -1,26 | -1,49 | -1,44 | -1,96 | -1,37 | -1,70 |
| BC014089  | LOC114984    | -1,77 | -1,76 | -1,61 | -1,78 | -1,76 | -1,69 |
| NM_001386 | DPYSL2       | -1,58 | -1,50 | -1,57 | -1,81 | -1,54 | -1,69 |
| NM_002954 | RPS27A       | -1,72 | -1,13 | -2,20 | -1,18 | -1,43 | -1,69 |
| NM_004330 | BNIP2        | -1,14 | -1,52 | -1,31 | -2,07 | -1,33 | -1,69 |
| NM_170711 | DAZAP1       | -2,06 | -1,47 | -1,85 | -1,53 | -1,77 | -1,69 |

|           |           |       |       |       |       |       |       |
|-----------|-----------|-------|-------|-------|-------|-------|-------|
| NM_005520 | HNRPH1    | -2,27 | -1,98 | -1,89 | -1,47 | -2,13 | -1,68 |
| NM_002835 | PTPN12    | -1,22 | -1,47 | -1,35 | -2,01 | -1,35 | -1,68 |
| NM_080422 | PTPN2     | -1,53 | -2,09 | -1,22 | -2,13 | -1,81 | -1,68 |
| NM_139168 | SFRS12    | -1,47 | -1,47 | -1,72 | -1,62 | -1,47 | -1,67 |
| NM_001412 | EIF1AX    | -1,90 | -1,53 | -1,82 | -1,51 | -1,72 | -1,67 |
| NM_016038 | SBDS      | -1,46 | -1,54 | -1,65 | -1,68 | -1,50 | -1,67 |
| NM_001731 | BTG1      | -1,35 | -1,50 | -1,59 | -1,73 | -1,42 | -1,66 |
| NM_019022 | TXNDC10   | -1,51 | -1,84 | -1,53 | -1,78 | -1,68 | -1,66 |
| NM_152429 | C10orf13  | -1,79 | -1,82 | -1,59 | -1,71 | -1,81 | -1,65 |
| NM_000981 | RPL19     | -1,63 | -1,06 | -2,15 | -1,15 | -1,34 | -1,65 |
| NM_003212 | TDGF1     | -4,03 | -5,07 | -1,29 | -2,01 | -4,55 | -1,65 |
| AF107457  | HLXB9     | -1,34 | -1,44 | -1,42 | -1,85 | -1,39 | -1,64 |
| NM_030674 | SLC38A1   | -1,27 | -1,47 | -1,40 | -1,87 | -1,37 | -1,63 |
| NM_152829 | TES       | -1,38 | -2,00 | -1,34 | -1,92 | -1,69 | -1,63 |
| BC021662  | FLJ22028  | -1,20 | -1,49 | -1,36 | -1,90 | -1,35 | -1,63 |
| NM_012412 | H2AFV     | -1,35 | -1,54 | -1,32 | -1,94 | -1,44 | -1,63 |
| NM_004881 | TP53I3    | -1,81 | -1,98 | -1,47 | -1,79 | -1,90 | -1,63 |
| NM_003472 | DEK       | -1,70 | -1,65 | -1,52 | -1,73 | -1,67 | -1,63 |
| NM_003530 | HIST1H3D  | -1,21 | -1,56 | -1,35 | -1,90 | -1,38 | -1,63 |
| NM_015235 | CSTF2T    | -2,01 | -2,33 | -1,67 | -1,58 | -2,17 | -1,62 |
| NM_016080 | C17orf25  | -2,14 | -1,24 | -1,99 | -1,26 | -1,69 | -1,62 |
| NM_002356 | MARCKS    | -1,73 | -2,06 | -1,27 | -1,97 | -1,90 | -1,62 |
| AK056096  | C9orf10OS | -1,59 | -2,01 | -1,28 | -1,96 | -1,80 | -1,62 |
| AK055693  | FLJ35036  | -1,45 | -2,30 | -1,03 | -2,21 | -1,87 | -1,62 |
| U92014    | SEC31L1   | -1,26 | -1,42 | -1,38 | -1,85 | -1,34 | -1,61 |
| NM_007212 | RNF2      | -1,94 | -1,48 | -1,87 | -1,36 | -1,71 | -1,61 |
| NM_022802 | CTBP2     | -1,28 | -1,95 | -1,15 | -2,07 | -1,62 | -1,61 |
| AY052478  | RAB39B    | -1,55 | -1,93 | -1,32 | -1,91 | -1,74 | -1,61 |
| NM_080632 | UPF3B     | -1,62 | -1,67 | -1,65 | -1,57 | -1,64 | -1,61 |
| NM_014153 | ZC3HDC7   | -1,25 | -1,49 | -1,40 | -1,81 | -1,37 | -1,60 |
| AB029039  | RBM16     | -1,81 | -1,62 | -1,60 | -1,60 | -1,71 | -1,60 |
| NM_022731 | NUCKS     | -1,41 | -1,36 | -1,54 | -1,66 | -1,38 | -1,60 |
| NM_002862 | PYGB      | -1,63 | -1,34 | -1,99 | -1,20 | -1,49 | -1,60 |
| NM_002032 | FTH1      | -1,75 | -1,11 | -2,02 | -1,18 | -1,43 | -1,60 |
| NM_012404 | ANP32D    | -1,68 | -1,35 | -1,93 | -1,25 | -1,52 | -1,59 |
| NM_002894 | RBBP8     | -1,72 | -2,21 | -1,29 | -1,89 | -1,97 | -1,59 |
| NM_002090 | CXCL3     | -1,61 | -1,60 | -1,52 | -1,66 | -1,60 | -1,59 |
| NM_007214 | SEC63     | -1,36 | -1,55 | -1,45 | -1,73 | -1,46 | -1,59 |
| NM_012158 | FBXL3     | -1,28 | -1,58 | -1,24 | -1,94 | -1,43 | -1,59 |
| NM_015630 | EPC2      | -1,74 | -1,90 | -1,33 | -1,83 | -1,82 | -1,58 |
| NM_018359 | FLJ11200  | -1,30 | -1,42 | -1,51 | -1,65 | -1,36 | -1,58 |
| NM_006451 | PAIP1     | -2,23 | -1,21 | -1,40 | -1,75 | -1,72 | -1,57 |
| NM_013438 | UBQLN1    | -1,29 | -1,62 | -1,20 | -1,94 | -1,46 | -1,57 |
| NM_005953 | MT2A      | -2,83 | -3,30 | -1,33 | -1,81 | -3,06 | -1,57 |
| NM_032705 | MGC14801  | -1,44 | -1,49 | -1,45 | -1,67 | -1,46 | -1,56 |
| NM_005794 | DHRS2     | -1,89 | -1,79 | -1,67 | -1,44 | -1,84 | -1,56 |
| NM_018147 | FAIM      | -1,98 | -2,16 | -1,21 | -1,90 | -2,07 | -1,55 |
| NM_002156 | HSPD1     | -1,86 | -1,35 | -2,08 | -1,02 | -1,60 | -1,55 |
| NM_024511 | C4orf15   | -1,23 | -1,38 | -1,35 | -1,75 | -1,31 | -1,55 |
| NM_000971 | RPL7      | -1,51 | -1,13 | -2,01 | -1,09 | -1,32 | -1,55 |
| NM_005500 | SAE1      | -1,45 | -1,67 | -1,35 | -1,74 | -1,56 | -1,54 |
| NM_173609 | C15orf21  | -2,49 | -2,07 | -1,92 | -1,15 | -2,28 | -1,54 |
| NM_014670 | BZW1      | -1,62 | -1,50 | -1,59 | -1,47 | -1,56 | -1,53 |
| NM_022154 | SLC39A8   | -1,81 | -2,17 | -1,26 | -1,80 | -1,99 | -1,53 |
| NM_018453 | C14orf11  | -2,10 | -1,05 | -1,98 | -1,08 | -1,58 | -1,53 |
| NM_016480 | PAIP2     | -1,30 | -1,86 | -1,23 | -1,82 | -1,58 | -1,53 |
| NM_139169 | TRUB1     | -1,54 | -1,78 | -1,26 | -1,79 | -1,66 | -1,52 |
| NM_020935 | USP37     | -1,65 | -1,37 | -1,67 | -1,37 | -1,51 | -1,52 |

|                 |            |              |              |              |              |       |       |
|-----------------|------------|--------------|--------------|--------------|--------------|-------|-------|
| AJ131186        | PRP19      | <b>-1,62</b> | <b>-1,37</b> | <b>-1,97</b> | -1,06        | -1,49 | -1,52 |
| NM_015934       | NOP5/NOP58 | <b>-2,09</b> | <b>-2,51</b> | -1,25        | <b>-1,78</b> | -2,30 | -1,51 |
| NM_004865       | TBPL1      | -1,28        | <b>-1,64</b> | -1,22        | <b>-1,80</b> | -1,46 | -1,51 |
| NM_020371       | AVEN       | <b>-1,53</b> | <b>-1,79</b> | -1,21        | <b>-1,82</b> | -1,66 | -1,51 |
| NM_145061       | C13orf3    | <b>-2,01</b> | <b>-1,99</b> | -1,29        | <b>-1,73</b> | -2,00 | -1,51 |
| NM_001239       | CCNH       | -1,27        | <b>-1,57</b> | -1,15        | <b>-1,87</b> | -1,42 | -1,51 |
| NM_032876       | JUB        | <b>-1,86</b> | <b>-2,36</b> | -1,23        | <b>-1,78</b> | -2,11 | -1,51 |
| NM_130469       | JDP2       | <b>-1,33</b> | <b>-2,00</b> | -1,10        | <b>-1,90</b> | -1,67 | -1,50 |
| NM_003758       | EIF3S1     | <b>-1,78</b> | <b>-1,67</b> | <b>-1,46</b> | <b>-1,54</b> | -1,72 | -1,50 |
| NM_022336       | EDAR       | <b>-1,72</b> | <b>-1,70</b> | <b>-1,48</b> | <b>-1,51</b> | -1,71 | -1,50 |
| NM_005968       | HNRPM      | <b>-4,31</b> | <b>-3,80</b> | <b>-1,81</b> | -1,19        | -4,06 | -1,50 |
| ENST00000332280 | LOC391126  | <b>-1,94</b> | -1,07        | <b>-1,97</b> | -1,01        | -1,51 | -1,49 |
| NM_033280       | SEC11L3    | <b>-1,66</b> | <b>-2,20</b> | -1,18        | <b>-1,80</b> | -1,93 | -1,49 |
| NM_004134       | HSPA9B     | <b>-1,38</b> | <b>-1,64</b> | <b>-1,36</b> | <b>-1,62</b> | -1,51 | -1,49 |
| BC000024        | C12orf14   | <b>-1,42</b> | <b>-1,35</b> | <b>-1,42</b> | <b>-1,55</b> | -1,39 | -1,49 |
| NM_031157       | LOC144983  | <b>-1,64</b> | <b>-1,45</b> | <b>-1,89</b> | -1,08        | -1,54 | -1,49 |
| NM_018339       | RFK        | <b>-1,35</b> | <b>-1,81</b> | -1,20        | <b>-1,78</b> | -1,58 | -1,49 |
| NM_000311       | PRNP       | -1,21        | <b>-1,48</b> | -1,24        | <b>-1,74</b> | -1,34 | -1,49 |
| NM_001746       | CANX       | <b>-1,36</b> | <b>-1,53</b> | <b>-1,41</b> | <b>-1,56</b> | -1,45 | -1,48 |
| NM_016618       | LOC51315   | <b>-1,35</b> | <b>-1,52</b> | <b>-1,34</b> | <b>-1,63</b> | -1,44 | -1,48 |
| NM_003714       | STC2       | <b>-1,46</b> | <b>-1,42</b> | <b>-1,65</b> | <b>-1,32</b> | -1,44 | -1,48 |
| BC039468        | NUP50      | <b>-1,56</b> | <b>-1,92</b> | -1,26        | <b>-1,70</b> | -1,74 | -1,48 |
| NM_015933       | HSPC016    | <b>-1,55</b> | <b>-1,32</b> | <b>-1,53</b> | <b>-1,42</b> | -1,44 | -1,48 |
| NM_018466       | GLT28D1    | <b>-1,36</b> | <b>-1,53</b> | -1,24        | <b>-1,72</b> | -1,45 | -1,48 |
| NM_002105       | H2AFX      | <b>-1,72</b> | <b>-1,45</b> | <b>-1,58</b> | <b>-1,37</b> | -1,58 | -1,48 |
| NM_005392       | PHF2       | -1,25        | <b>-1,46</b> | -1,28        | <b>-1,67</b> | -1,35 | -1,48 |
| NM_153231       | ZNF550     | <b>-1,38</b> | <b>-1,50</b> | -1,27        | <b>-1,68</b> | -1,44 | -1,47 |
| NM_001545       | ICT1       | <b>-1,44</b> | <b>-1,55</b> | <b>-1,44</b> | <b>-1,50</b> | -1,49 | -1,47 |
| NM_156036       | HOXB6      | -1,23        | <b>-1,60</b> | -1,12        | <b>-1,82</b> | -1,42 | -1,47 |
| NM_015327       | EST1B      | <b>-1,49</b> | <b>-1,41</b> | <b>-1,60</b> | <b>-1,33</b> | -1,45 | -1,47 |
| NM_006861       | RAB35      | <b>-1,33</b> | <b>-1,50</b> | <b>-1,40</b> | <b>-1,53</b> | -1,41 | -1,47 |
| NM_006807       | CBX1       | <b>-1,33</b> | <b>-1,92</b> | -1,05        | <b>-1,88</b> | -1,63 | -1,47 |
| AK023624        | HIS1       | <b>-1,69</b> | <b>-1,62</b> | <b>-1,43</b> | <b>-1,51</b> | -1,66 | -1,47 |
| NM_004096       | EIF4EBP2   | <b>-1,65</b> | <b>-1,42</b> | <b>-1,49</b> | <b>-1,44</b> | -1,54 | -1,47 |
| NM_001969       | EIF5       | <b>-1,48</b> | <b>-1,37</b> | <b>-1,44</b> | <b>-1,49</b> | -1,42 | -1,47 |
| NM_001904       | CTNNB1     | <b>-1,87</b> | <b>-1,57</b> | <b>-1,72</b> | -1,21        | -1,72 | -1,46 |
| AK056822        | LOC400960  | <b>-1,57</b> | <b>-1,57</b> | <b>-1,35</b> | <b>-1,57</b> | -1,57 | -1,46 |
| NM_022747       | C14orf65   | <b>-1,71</b> | -1,18        | <b>-1,56</b> | <b>-1,36</b> | -1,44 | -1,46 |
| BC038454        | ZNF326     | <b>-2,06</b> | <b>-2,47</b> | -1,25        | <b>-1,66</b> | -2,27 | -1,46 |
| NM_007187       | WBP4       | <b>-1,34</b> | <b>-1,44</b> | -1,27        | <b>-1,64</b> | -1,39 | -1,46 |
| BC035153        | FLJ22313   | <b>-1,63</b> | <b>-2,15</b> | -1,17        | <b>-1,74</b> | -1,89 | -1,46 |
| NM_138375       | CABLES1    | <b>-1,98</b> | <b>-2,14</b> | <b>-1,25</b> | <b>-1,66</b> | -2,06 | -1,45 |
| NM_000978       | RPL23      | <b>-1,44</b> | <b>-1,43</b> | <b>-1,64</b> | -1,26        | -1,43 | -1,45 |
| NM_004071       | CLK1       | <b>-1,38</b> | <b>-1,44</b> | <b>-1,47</b> | <b>-1,43</b> | -1,41 | -1,45 |
| NM_173576       | C10orf48   | <b>-1,67</b> | <b>-1,93</b> | -1,23        | <b>-1,67</b> | -1,80 | -1,45 |
| NM_004688       | NMI        | <b>-1,55</b> | <b>-1,85</b> | -1,15        | <b>-1,75</b> | -1,70 | -1,45 |
| AK000814        | PLA2G4B    | <b>-1,55</b> | <b>-1,92</b> | -1,23        | <b>-1,66</b> | -1,74 | -1,45 |
| NM_014432       | IL20RA     | <b>-1,82</b> | <b>-1,95</b> | -1,27        | <b>-1,62</b> | -1,88 | -1,45 |
| AL137667        | MAPK8      | -1,30        | <b>-1,53</b> | -1,20        | <b>-1,69</b> | -1,42 | -1,45 |
| U39064          | MAP2K6     | <b>-1,46</b> | <b>-1,57</b> | <b>-1,34</b> | <b>-1,55</b> | -1,52 | -1,44 |
| D86962          | GRB10      | <b>-1,43</b> | <b>-1,92</b> | -1,08        | <b>-1,80</b> | -1,68 | -1,44 |
| AL133014        | C7orf20    | -1,24        | <b>-1,64</b> | -1,16        | <b>-1,73</b> | -1,44 | -1,44 |
| NM_000321       | RB1        | <b>-1,99</b> | <b>-1,88</b> | <b>-1,45</b> | <b>-1,44</b> | -1,94 | -1,44 |
| AK096179        | LOC285958  | <b>-1,80</b> | <b>-2,34</b> | -1,17        | <b>-1,71</b> | -2,07 | -1,44 |
| NM_001356       | DDX3X      | -1,21        | <b>-1,53</b> | <b>-1,31</b> | <b>-1,57</b> | -1,37 | -1,44 |
| NM_007269       | STXBP3     | <b>-1,36</b> | <b>-1,76</b> | -1,10        | <b>-1,78</b> | -1,56 | -1,44 |
| NM_004125       | GNG10      | <b>-1,55</b> | <b>-1,58</b> | <b>-1,33</b> | <b>-1,56</b> | -1,56 | -1,44 |
| NM_003404       | YWHAB      | <b>-2,05</b> | <b>-2,79</b> | -1,18        | <b>-1,70</b> | -2,42 | -1,44 |

|            |           |              |              |              |              |       |       |
|------------|-----------|--------------|--------------|--------------|--------------|-------|-------|
| NM_000224  | KRT18     | <b>-1,40</b> | <b>-1,32</b> | <b>-1,88</b> | -1,00        | -1,36 | -1,44 |
| NM_002669  | PLRG1     | <b>-1,51</b> | <b>-1,54</b> | <b>-1,47</b> | <b>-1,41</b> | -1,52 | -1,44 |
| NM_001719  | BMP7      | <b>-1,56</b> | <b>-1,83</b> | <b>-1,29</b> | <b>-1,58</b> | -1,70 | -1,44 |
| NM_012110  | CHIC2     | <b>-1,33</b> | <b>-1,46</b> | <b>-1,38</b> | <b>-1,50</b> | -1,39 | -1,44 |
| NM_001530  | HIF1A     | -1,28        | <b>-1,50</b> | -1,23        | <b>-1,64</b> | -1,39 | -1,44 |
| NM_007104  | RPL10A    | <b>-1,52</b> | <b>-1,34</b> | <b>-1,74</b> | -1,13        | -1,43 | -1,44 |
| NM_152680  | FLJ32028  | <b>-1,46</b> | <b>-1,57</b> | -1,24        | <b>-1,63</b> | -1,52 | -1,44 |
| NM_016444  | ZNF226    | -1,27        | <b>-1,57</b> | -1,11        | <b>-1,75</b> | -1,42 | -1,43 |
| NM_152858  | WTAP      | <b>-1,99</b> | <b>-2,19</b> | -1,27        | <b>-1,59</b> | -2,09 | -1,43 |
| M27396     | ASNS      | <b>-1,37</b> | -1,29        | <b>-1,81</b> | -1,05        | -1,33 | -1,43 |
| D87077     | KIAA0240  | <b>-1,46</b> | <b>-1,57</b> | <b>-1,39</b> | <b>-1,46</b> | -1,51 | -1,43 |
| NM_018981  | DNAJC10   | <b>-1,74</b> | <b>-2,07</b> | -1,18        | <b>-1,67</b> | -1,90 | -1,43 |
| NM_018475  | TPARL     | <b>-1,36</b> | <b>-1,70</b> | -1,29        | <b>-1,56</b> | -1,53 | -1,42 |
| NM_006013  | RPL10     | <b>-1,51</b> | -1,12        | <b>-1,77</b> | -1,08        | -1,32 | -1,42 |
| M96956     | TDGF3     | <b>-2,23</b> | <b>-2,26</b> | <b>-1,42</b> | <b>-1,42</b> | -2,24 | -1,42 |
| AB051540   | ZC3HDC5   | <b>-1,38</b> | <b>-1,46</b> | -1,26        | <b>-1,59</b> | -1,42 | -1,42 |
| NM_000344  | SMN1      | <b>-1,31</b> | <b>-1,51</b> | -1,22        | <b>-1,62</b> | -1,41 | -1,42 |
| AK056774   | H19       | <b>-1,61</b> | <b>-1,55</b> | <b>-1,75</b> | -1,09        | -1,58 | -1,42 |
| NM_174908  | C3orf6    | <b>-1,30</b> | <b>-1,31</b> | <b>-1,31</b> | <b>-1,53</b> | -1,31 | -1,42 |
| NM_016304  | C15orf15  | -1,28        | <b>-1,63</b> | -1,22        | <b>-1,61</b> | -1,45 | -1,42 |
| AB051506   | GRIP2     | <b>-1,44</b> | -1,20        | <b>-1,71</b> | -1,13        | -1,32 | -1,42 |
| NM_006082  | K-ALPHA-1 | <b>-1,49</b> | <b>-1,35</b> | <b>-1,65</b> | -1,18        | -1,42 | -1,41 |
| NM_018347  | C20orf29  | <b>-1,30</b> | <b>-1,74</b> | -1,10        | <b>-1,72</b> | -1,52 | -1,41 |
| NM_015423  | AASDHPPT  | <b>-1,96</b> | <b>-2,09</b> | -1,23        | <b>-1,59</b> | -2,02 | -1,41 |
| NM_153451  | ORAOV1    | <b>-1,32</b> | <b>-1,63</b> | -1,22        | <b>-1,60</b> | -1,47 | -1,41 |
| NM_016205  | PDGFC     | <b>-1,38</b> | <b>-1,80</b> | -1,13        | <b>-1,70</b> | -1,59 | -1,41 |
| NM_001029  | RPS26     | <b>-1,60</b> | -1,14        | <b>-1,80</b> | -1,02        | -1,37 | -1,41 |
| NM_153207  | AEBP2     | <b>-1,49</b> | <b>-1,80</b> | -1,18        | <b>-1,64</b> | -1,64 | -1,41 |
| NM_016492  | RANGNRF   | <b>-1,45</b> | <b>-1,84</b> | -1,14        | <b>-1,68</b> | -1,64 | -1,41 |
| NM_003653  | COPS3     | <b>-1,47</b> | <b>-1,81</b> | -1,18        | <b>-1,63</b> | -1,64 | -1,41 |
| NM_002874  | RAD23B    | -1,27        | <b>-1,41</b> | <b>-1,31</b> | <b>-1,50</b> | -1,34 | -1,41 |
| AY007811   | KIAA1199  | <b>-2,55</b> | <b>-3,42</b> | -1,26        | <b>-1,55</b> | -2,98 | -1,41 |
| NM_002408  | MGAT2     | <b>-1,35</b> | <b>-1,73</b> | -1,10        | <b>-1,71</b> | -1,54 | -1,41 |
| NM_001014  | RPS10     | <b>-1,80</b> | -1,09        | <b>-1,78</b> | -1,03        | -1,45 | -1,40 |
| BC065759   | IRF2BP2   | <b>-1,51</b> | <b>-1,44</b> | -1,26        | <b>-1,55</b> | -1,47 | -1,40 |
| NM_016079  | VPS24     | -1,23        | <b>-1,53</b> | -1,16        | <b>-1,64</b> | -1,38 | -1,40 |
| NM_013943  | CLIC4     | <b>-1,41</b> | <b>-1,68</b> | -1,20        | <b>-1,60</b> | -1,54 | -1,40 |
| THC1880732 | HSPC129   | -1,23        | <b>-1,42</b> | -1,15        | <b>-1,65</b> | -1,32 | -1,40 |
| NM_014223  | NFYC      | <b>-1,60</b> | <b>-1,68</b> | -1,30        | <b>-1,50</b> | -1,64 | -1,40 |
| NM_002009  | FGF7      | <b>-1,37</b> | <b>-1,51</b> | -1,23        | <b>-1,57</b> | -1,44 | -1,40 |
| AK096099   | LOC90288  | -1,26        | <b>-1,71</b> | -1,14        | <b>-1,65</b> | -1,48 | -1,40 |
| NM_022756  | FLJ11730  | <b>-1,70</b> | -1,18        | <b>-1,66</b> | -1,13        | -1,44 | -1,40 |
| BC021694   | ADD3      | <b>-1,50</b> | <b>-1,66</b> | <b>-1,31</b> | <b>-1,48</b> | -1,58 | -1,39 |
| NM_018105  | THAP1     | -1,24        | <b>-1,37</b> | -1,21        | <b>-1,57</b> | -1,30 | -1,39 |
| AF151813   | PAI-RBP1  | <b>-1,65</b> | <b>-1,71</b> | <b>-1,35</b> | <b>-1,44</b> | -1,68 | -1,39 |
| BC043386   | LOC374920 | <b>-1,37</b> | -1,24        | <b>-1,43</b> | <b>-1,36</b> | -1,31 | -1,39 |
| NM_007052  | NOX1      | <b>-1,33</b> | <b>-1,30</b> | <b>-1,37</b> | <b>-1,42</b> | -1,31 | -1,39 |
| AK025166   | C10orf12  | <b>-1,50</b> | <b>-1,48</b> | -1,28        | <b>-1,50</b> | -1,49 | -1,39 |
| NM_003541  | HIST1H4K  | -1,23        | <b>-1,47</b> | -1,14        | <b>-1,63</b> | -1,35 | -1,39 |
| NM_024017  | HOXB9     | <b>-1,50</b> | <b>-1,51</b> | <b>-1,42</b> | <b>-1,35</b> | -1,51 | -1,39 |
| NM_020792  | KIAA1363  | <b>-1,57</b> | <b>-1,33</b> | <b>-1,41</b> | <b>-1,36</b> | -1,45 | -1,39 |
| BC012895   | SLC7A1    | -1,24        | <b>-1,40</b> | <b>-1,33</b> | <b>-1,44</b> | -1,32 | -1,39 |
| NM_013386  | SLC25A24  | <b>-1,43</b> | <b>-1,74</b> | -1,12        | <b>-1,66</b> | -1,58 | -1,39 |
| NM_138425  | GRCC10    | -1,22        | <b>-1,42</b> | -1,11        | <b>-1,66</b> | -1,32 | -1,38 |
| NM_025138  | C13orf23  | <b>-1,41</b> | <b>-1,99</b> | -1,05        | <b>-1,72</b> | -1,70 | -1,38 |
| NM_001968  | EIF4E     | <b>-1,55</b> | -1,09        | <b>-1,65</b> | -1,12        | -1,32 | -1,38 |
| NM_013390  | TMEM2     | <b>-1,54</b> | <b>-1,74</b> | <b>-1,32</b> | <b>-1,44</b> | -1,64 | -1,38 |
| NM_152283  | ZFP62     | <b>-2,25</b> | <b>-2,87</b> | -1,23        | <b>-1,53</b> | -2,56 | -1,38 |

|            |               |              |              |              |              |       |       |
|------------|---------------|--------------|--------------|--------------|--------------|-------|-------|
| NM_032476  | MRPS6         | <b>-1,33</b> | <b>-1,64</b> | -1,16        | <b>-1,59</b> | -1,49 | -1,38 |
| NM_022770  | FLJ13912      | <b>-1,72</b> | <b>-2,04</b> | -1,22        | <b>-1,54</b> | -1,88 | -1,38 |
| NM_002539  | ODC1          | <b>-1,87</b> | <b>-2,07</b> | <b>-1,43</b> | <b>-1,33</b> | -1,97 | -1,38 |
| NM_004642  | CDK2AP1       | <b>-1,37</b> | <b>-1,61</b> | <b>-1,27</b> | <b>-1,48</b> | -1,49 | -1,38 |
| BC029911   | C9orf119      | -1,29        | <b>-1,41</b> | -1,29        | <b>-1,46</b> | -1,35 | -1,38 |
| NM_014169  | C14orf123     | -1,27        | <b>-1,54</b> | <b>-1,31</b> | <b>-1,44</b> | -1,41 | -1,38 |
| AK056882   | RASEF         | <b>-1,45</b> | <b>-1,53</b> | <b>-1,36</b> | <b>-1,38</b> | -1,49 | -1,37 |
| NM_005843  | STAM2         | -1,30        | <b>-1,36</b> | <b>-1,35</b> | <b>-1,40</b> | -1,33 | -1,37 |
| AL833957   | SETDB2        | <b>-1,32</b> | <b>-1,31</b> | -1,28        | <b>-1,46</b> | -1,32 | -1,37 |
| NM_033342  | TRIM7         | <b>-1,68</b> | <b>-2,10</b> | -1,14        | <b>-1,60</b> | -1,89 | -1,37 |
| NM_019071  | ING3          | -1,20        | <b>-1,66</b> | -1,10        | <b>-1,63</b> | -1,43 | -1,37 |
| NM_014517  | UBP1          | <b>-1,93</b> | <b>-1,77</b> | <b>-1,42</b> | <b>-1,31</b> | -1,85 | -1,37 |
| NM_145306  | C10orf35      | -1,30        | -1,30        | <b>-1,40</b> | <b>-1,33</b> | -1,30 | -1,37 |
| NM_181523  | PIK3R1        | <b>-1,65</b> | <b>-1,36</b> | <b>-1,59</b> | -1,14        | -1,51 | -1,37 |
| AF292100   | RP42          | <b>-1,67</b> | -1,23        | <b>-1,63</b> | -1,10        | -1,45 | -1,36 |
| NM_006938  | SNRPD1        | <b>-1,71</b> | -1,27        | <b>-1,64</b> | -1,08        | -1,49 | -1,36 |
| NM_007129  | ZIC2          | <b>-1,42</b> | -1,27        | <b>-1,39</b> | <b>-1,34</b> | -1,35 | -1,36 |
| NM_152716  | FLJ36874      | <b>-1,51</b> | <b>-1,42</b> | -1,27        | <b>-1,45</b> | -1,46 | -1,36 |
| D79986     | BCLAF1        | <b>-2,26</b> | <b>-3,16</b> | -1,04        | <b>-1,68</b> | -2,71 | -1,36 |
| NM_020128  | MDM1          | <b>-1,62</b> | <b>-1,57</b> | <b>-1,34</b> | <b>-1,38</b> | -1,60 | -1,36 |
| NM_002909  | REG1A         | <b>-2,42</b> | <b>-2,37</b> | -1,15        | <b>-1,57</b> | -2,40 | -1,36 |
| NM_173200  | NR4A3         | <b>-1,41</b> | <b>-1,49</b> | -1,29        | <b>-1,42</b> | -1,45 | -1,36 |
| AL512717   | DKFZp547E052  | <b>-1,31</b> | <b>-1,66</b> | -1,16        | <b>-1,55</b> | -1,48 | -1,36 |
| AK027900   | FLJ10853      | <b>-1,50</b> | <b>-1,82</b> | -1,23        | <b>-1,48</b> | -1,66 | -1,35 |
| NM_001046  | SLC12A2       | <b>-3,05</b> | <b>-4,10</b> | -1,06        | <b>-1,64</b> | -3,57 | -1,35 |
| AB007896   | KIAA0436      | <b>-2,18</b> | <b>-2,29</b> | -1,19        | <b>-1,52</b> | -2,23 | -1,35 |
| BX640898   | THUMPD1       | <b>-1,46</b> | -1,29        | <b>-1,47</b> | -1,23        | -1,38 | -1,35 |
| NM_000969  | RPL5          | <b>-1,46</b> | -1,18        | <b>-1,69</b> | -1,01        | -1,32 | -1,35 |
| NM_015230  | CENTD1        | <b>-1,33</b> | <b>-1,36</b> | <b>-1,36</b> | <b>-1,34</b> | -1,34 | -1,35 |
| NM_014766  | SCRN1         | <b>-1,33</b> | <b>-1,45</b> | -1,19        | <b>-1,51</b> | -1,39 | -1,35 |
| NM_032593  | HINT2         | <b>-1,40</b> | <b>-1,62</b> | -1,28        | <b>-1,42</b> | -1,51 | -1,35 |
| X78926     | ZNF268        | <b>-1,67</b> | <b>-1,78</b> | -1,12        | <b>-1,57</b> | -1,72 | -1,35 |
| THC1869938 | CARD9         | <b>-1,47</b> | <b>-1,31</b> | <b>-1,35</b> | <b>-1,34</b> | -1,39 | -1,35 |
| BC038180   | OGT           | <b>-2,10</b> | <b>-1,91</b> | <b>-1,46</b> | -1,23        | -2,00 | -1,34 |
| NM_052965  | C1orf19       | <b>-1,57</b> | <b>-2,30</b> | -1,00        | <b>-1,69</b> | -1,93 | -1,34 |
| NM_016404  | HSPC152       | <b>-1,50</b> | <b>-1,66</b> | -1,23        | <b>-1,46</b> | -1,58 | -1,34 |
| NM_181838  | UBE2D2        | -1,28        | <b>-1,60</b> | -1,22        | <b>-1,47</b> | -1,44 | -1,34 |
| NM_004557  | NOTCH4        | <b>-1,44</b> | <b>-1,38</b> | -1,30        | <b>-1,39</b> | -1,41 | -1,34 |
| NM_005949  | MT1F          | <b>-1,44</b> | <b>-1,60</b> | -1,15        | <b>-1,53</b> | -1,52 | -1,34 |
| NM_170784  | MKKS          | -1,20        | <b>-1,41</b> | -1,15        | <b>-1,52</b> | -1,31 | -1,34 |
| NM_003589  | CUL4A         | <b>-1,79</b> | <b>-1,75</b> | <b>-1,30</b> | <b>-1,37</b> | -1,77 | -1,34 |
| BC020784   | MGC14289      | <b>-1,82</b> | <b>-2,23</b> | -1,09        | <b>-1,58</b> | -2,03 | -1,34 |
| BC007436   | FAM44B        | -1,25        | <b>-1,53</b> | -1,11        | <b>-1,56</b> | -1,39 | -1,33 |
| NM_007280  | OIP5          | <b>-1,33</b> | <b>-1,53</b> | -1,08        | <b>-1,58</b> | -1,43 | -1,33 |
| NM_003177  | SYK           | <b>-2,86</b> | <b>-2,98</b> | <b>-1,34</b> | <b>-1,33</b> | -2,92 | -1,33 |
| NM_005857  | ZMPSTE24      | <b>-1,82</b> | <b>-1,79</b> | <b>-1,31</b> | <b>-1,35</b> | -1,81 | -1,33 |
| NM_024516  | MGC4606       | <b>-1,39</b> | <b>-1,94</b> | -1,10        | <b>-1,56</b> | -1,66 | -1,33 |
| NM_005805  | PSMD14        | -1,22        | <b>-1,53</b> | -1,15        | <b>-1,51</b> | -1,37 | -1,33 |
| AL050260   | DKFZP547E1010 | <b>-1,38</b> | <b>-1,43</b> | -1,26        | <b>-1,40</b> | -1,40 | -1,33 |
| BC039145   | LOC283464     | -1,28        | <b>-1,51</b> | -1,12        | <b>-1,53</b> | -1,39 | -1,33 |
| BC002526   | HSPA4         | <b>-1,38</b> | -1,27        | <b>-1,38</b> | -1,27        | -1,33 | -1,33 |
| NM_006808  | SEC61B        | -1,24        | <b>-1,41</b> | -1,14        | <b>-1,52</b> | -1,33 | -1,33 |
| NM_001949  | E2F3          | -1,24        | <b>-1,64</b> | -1,12        | <b>-1,53</b> | -1,44 | -1,33 |
| BC008024   | SLB           | -1,25        | <b>-1,64</b> | -1,03        | <b>-1,63</b> | -1,45 | -1,33 |
| AF165518   | FLJ10292      | <b>-1,34</b> | <b>-1,69</b> | -1,00        | <b>-1,64</b> | -1,51 | -1,32 |
| NM_002370  | MAGOH         | <b>-1,32</b> | <b>-1,53</b> | -1,18        | <b>-1,46</b> | -1,42 | -1,32 |
| NM_002128  | HMGB1         | <b>-1,95</b> | <b>-2,01</b> | <b>-1,34</b> | -1,30        | -1,98 | -1,32 |
| BC028932   | RRM2          | -1,22        | <b>-1,63</b> | -1,22        | <b>-1,41</b> | -1,43 | -1,32 |

|            |           |              |              |              |              |       |       |
|------------|-----------|--------------|--------------|--------------|--------------|-------|-------|
| NM_006331  | C2F       | <b>-1,62</b> | <b>-1,85</b> | -1,27        | <b>-1,36</b> | -1,73 | -1,32 |
| AB082526   | NEK9      | -1,20        | <b>-1,53</b> | -1,08        | <b>-1,55</b> | -1,37 | -1,32 |
| NM_001959  | EEF1B2    | <b>-1,61</b> | <b>-1,45</b> | <b>-1,61</b> | -1,02        | -1,53 | -1,32 |
| THC1807966 | SMAD1     | <b>-1,55</b> | <b>-1,44</b> | <b>-1,22</b> | <b>-1,41</b> | -1,50 | -1,32 |
| NM_001274  | CHEK1     | -1,26        | <b>-1,43</b> | -1,23        | <b>-1,40</b> | -1,35 | -1,31 |
| NM_170695  | TGIF      | <b>-1,43</b> | <b>-1,36</b> | <b>-1,36</b> | -1,27        | -1,40 | -1,31 |
| NM_176870  | MT1K      | <b>-2,89</b> | <b>-3,08</b> | -1,24        | <b>-1,38</b> | -2,98 | -1,31 |
| NM_003655  | CBX4      | <b>-1,37</b> | -1,27        | <b>-1,46</b> | -1,17        | -1,32 | -1,31 |
| AB011134   | KIAA0562  | <b>-1,45</b> | <b>-1,71</b> | -1,16        | <b>-1,46</b> | -1,58 | -1,31 |
| NM_052831  | C6orf192  | <b>-1,80</b> | <b>-1,80</b> | <b>-1,31</b> | <b>-1,32</b> | -1,80 | -1,31 |
| NM_003517  | HIST2H2AC | -1,25        | <b>-1,40</b> | -1,22        | <b>-1,40</b> | -1,33 | -1,31 |
| NM_024945  | C9orf76   | <b>-1,35</b> | <b>-1,63</b> | -1,16        | <b>-1,46</b> | -1,49 | -1,31 |
| NM_014577  | BRD1      | <b>-1,42</b> | <b>-1,38</b> | -1,30        | <b>-1,33</b> | -1,40 | -1,31 |
| NM_173809  | BLOC1S2   | <b>-1,37</b> | <b>-1,49</b> | -1,23        | <b>-1,39</b> | -1,43 | -1,31 |
| NM_013282  | UHRF1     | <b>-2,28</b> | <b>-2,13</b> | <b>-1,37</b> | -1,25        | -2,20 | -1,31 |
| NM_003685  | KHSRP     | <b>-1,70</b> | <b>-1,39</b> | <b>-1,33</b> | -1,28        | -1,55 | -1,31 |
| AF161386   | HSPC268   | <b>-1,55</b> | <b>-1,65</b> | -1,21        | <b>-1,41</b> | -1,60 | -1,31 |
| NM_004438  | EPHA4     | <b>-1,45</b> | <b>-1,38</b> | <b>-1,14</b> | <b>-1,47</b> | -1,42 | -1,30 |
| NM_021968  | HIST1H4J  | <b>-1,39</b> | -1,25        | -1,14        | <b>-1,47</b> | -1,32 | -1,30 |
| NM_005782  | THOC4     | <b>-2,31</b> | <b>-1,63</b> | <b>-1,58</b> | -1,03        | -1,97 | -1,30 |
| NM_032997  | ZWINT     | <b>-1,91</b> | <b>-2,16</b> | -1,18        | <b>-1,42</b> | -2,03 | -1,30 |
| NM_006303  | JTV1      | <b>-1,36</b> | <b>-1,55</b> | -1,17        | <b>-1,43</b> | -1,46 | -1,30 |
| AK026606   | MESDC2    | <b>-1,39</b> | <b>-1,38</b> | -1,27        | <b>-1,33</b> | -1,39 | -1,30 |
| NM_144591  | C10orf32  | <b>-2,04</b> | <b>-2,07</b> | -1,24        | <b>-1,36</b> | -2,06 | -1,30 |
| AK023950   | C11orf23  | <b>-1,34</b> | <b>-1,33</b> | <b>-1,35</b> | -1,24        | -1,34 | -1,30 |
