# Supplementary material
Source: PubMed Central journal article supplement (PMC2669348)
Supplement: 0813221106_ST2_PDF.pdf [file 0813221106_ST2_PDF.pdf]

**TABLE S2.** List of oligonucleotide sequences used for PCR

| SPECIE | PRIMER        | SENSE                           | ANTISENSE                         |
|--------|---------------|---------------------------------|-----------------------------------|
| Human  | $\beta$ actin | 5'-CGCAAGTACTCCGTGTGGA-3'       | 5'-CGGCCACATTGTGAACTTTG-3'        |
| Human  | Delta1        | 5'-ATCTGCCTGCCTGGATGTGATG-3'    | 5'-AGACAGCCTGGATAGCGGATACAC-3'    |
| Human  | Delta4        | 5'-TTGGATGAGCAAACCAGCACCC-3'    | 5'-TGACAGCCCGAAAGACAGATAGG-3'     |
| Human  | Jagged1       | 5'-CAACCGTGCCAGTACTATTTCTGC-3'  | 5'-TGTTCCCGTGAAGCCTTTGTTACAG-3'   |
| Human  | Jagged2       | 5'-AACGATACCACCCCGAATGAGG-3'    | 5'-GCTGCCACAGTAGTTCAGGTCTTTG-3'   |
| Human  | Hes1          | 5'-TACCTCTCTCCTTGGTCCTGGAAC-3'  | 5'-CAGATGCTGTCT TTGGTTTATCCG -3'  |
| Human  | SOX9          | 5'-GGAGAGCGAGGAGGACAAGTTC-3'    | 5'-TTGAAGATGGCGTTGGGGG-3'         |
| Human  | CD44          | 5'-AACCACACCACGGGCTTTTGAC-3'    | 5'-CCTTCTTCCTGCTTGATGATGACCTCG-3' |
| Human  | NOX1          | 5'-CCAGCAGAAGGTTGTGATTACCAAG-3' | 5'-CAAGATAGAAGCAAAGGGGGTGAC-3'    |
| Human  | KLF5          | 5'-CCAGACAAGCATCCAGGAGAAGTTG-3' | 5'-AGATTGGGGAACCGACAGTGAAGG-3'    |
| Human  | EpHB3         | 5'-AAAGTGGGTGGGAAGAGGTGAG-3'    | 5'-GATGTTGGGGATGCTGTTGC-3'        |

| SPECIE | PRIMER PROMOTER | SENSE                           | ANTISENSE                      |
|--------|-----------------|---------------------------------|--------------------------------|
| Human  | SOX9            | 5'-ATGAGAGACACCACCAATGCCTCC-3'  | 5'-GAGAGATAGAAGTTTGCCAATGCG-3' |
| Human  | CD44            | 5'-ATAGATGGATGGGCGGATGGAAGG-3'  | 5'-ATAGGGCTGGCATTGGCTCAG-3'    |
| Human  | Hes1            | 5'-GCCGCCAGACCTTGTGCCTG-3'      | 5'-CCGGATCCTGTGTGATCCCTAG-3'   |
| Human  | KLF5            | 5'-CTCTGAAGTGATGAATAGGCTGTGG-3' | 5'-GGGAGGACGGAACAATAAACTGC-3'  |
| Human  | NOX1            | 5'-TGCTGAATCTTCCTGTTGCC-3'      | 5'-TCTTGATGAGCCCAATAATCGG-3'   |
| Human  | EpHB3           | 5'-CTTAGGCTTTTCGGCTCTACAATG-3'  | 5'-GCAAGACAGGCACTTAGTCCTC-3'   |
| Human  | Jagged1         | 5'-AGAACTCAAGCCCCAAACCG-3'      | 5'-CACTCCTGGTCATAATCAAGGTCG-3' |
