# Supplementary material
Source: PubMed Central journal article supplement (PMC2669348)
Supplement: 0813221106_ST3_PDF.pdf [file 0813221106_ST3_PDF.pdf]

**TABLE S3.** List of genes that are a minimum of 1.3 fold upregulated in N1IC/dnTCF4 expressing clones and were downregulated by both treatments

| NAME      | GENE SYMBOL   | AVERAGE DOXY | AVERAGE DAPT | NIC-14 | NIC-15 | AVERAGE N1IC vs DAPT | AVERAGE N1IC vs DOXY |
|-----------|---------------|--------------|--------------|--------|--------|----------------------|----------------------|
| BC006322  | ATF3          | -1,63        | -3,00        | 2,61   | 10,55  | 12,09                | <b>6,58</b>          |
| NM_005194 | CEBPB         | -1,59        | -2,30        | 2,82   | 5,77   | 6,229                | <b>4,30</b>          |
| NM_002928 | RGS16         | -2,89        | -1,83        | 2,62   | 5,78   | 2,662                | <b>4,20</b>          |
| NM_006472 | TXNIP         | -1,88        | -2,60        | 4,33   | 3,87   | 5,667                | <b>4,10</b>          |
| NM_021158 | TRIB3         | -1,37        | -2,31        | 3,32   | 3,69   | 5,904                | <b>3,50</b>          |
| NM_052966 | C1orf24       | -1,63        | -2,31        | 3,24   | 3,31   | 4,647                | <b>3,28</b>          |
| AK056774  | H19           | -1,58        | -1,42        | 2,28   | 4,05   | 2,837                | <b>3,16</b>          |
| NM_053000 | TIGA1         | -1,91        | -2,21        | 2,96   | 3,33   | 3,654                | <b>3,15</b>          |
| NM_005384 | NFIL3         | -1,30        | -2,31        | 2,61   | 3,55   | 5,483                | <b>3,08</b>          |
| NM_005318 | H1FO          | -2,13        | -3,37        | 3,36   | 2,76   | 4,832                | <b>3,06</b>          |
| NM_016947 | C6orf48       | -1,60        | -2,33        | 3,40   | 2,33   | 4,19                 | <b>2,87</b>          |
| NM_005564 | LCN2          | -1,57        | -2,25        | 2,71   | 2,74   | 3,926                | <b>2,73</b>          |
| M27396    | ASNS          | -1,33        | -1,43        | 2,55   | 2,88   | 2,921                | <b>2,71</b>          |
| NM_014685 | HERPUD1       | -1,64        | -1,95        | 2,60   | 2,58   | 3,065                | <b>2,59</b>          |
| NM_016201 | AMOTL2        | -2,70        | -1,89        | 2,11   | 2,97   | 1,78                 | <b>2,54</b>          |
| NM_005524 | HES1          | -1,31        | -3,34        | 1,62   | 3,40   | 6,414                | <b>2,51</b>          |
| NM_006516 | SLC2A1        | -1,42        | -1,78        | 2,63   | 2,29   | 3,088                | <b>2,46</b>          |
| NM_016618 | LOC51315      | -1,44        | -1,48        | 2,45   | 2,42   | 2,514                | <b>2,43</b>          |
| AL833872  | DKFZp761P0423 | -1,69        | -2,06        | 2,27   | 2,50   | 2,909                | <b>2,38</b>          |
| NM_013943 | CLIC4         | -1,54        | -1,40        | 1,95   | 2,82   | 2,164                | <b>2,38</b>          |
| AY052478  | RAB39B        | -1,74        | -1,61        | 2,04   | 2,71   | 2,195                | <b>2,37</b>          |
| AY007811  | KIAA1199      | -2,98        | -1,41        | 2,69   | 2,01   | 1,108                | <b>2,35</b>          |
| BC038180  | OGT           | -2,00        | -1,34        | 2,27   | 2,27   | 1,525                | <b>2,27</b>          |
| BC021662  | FLJ22028      | -1,35        | -1,63        | 2,31   | 2,01   | 2,612                | <b>2,16</b>          |
| NM_014330 | PPP1R15A      | -1,59        | -2,41        | 1,96   | 2,36   | 3,271                | <b>2,16</b>          |
| NM_006948 | STCH          | -1,50        | -2,00        | 2,23   | 2,07   | 2,87                 | <b>2,15</b>          |
| NM_004438 | EPHA4         | -1,42        | -1,30        | 1,81   | 2,41   | 1,948                | <b>2,11</b>          |
| NM_033260 | FOXQ1         | -1,58        | -2,60        | 1,61   | 2,62   | 3,482                | <b>2,11</b>          |
| NM_018976 | SLC38A2       | -1,75        | -1,82        | 1,84   | 2,31   | 2,159                | <b>2,07</b>          |
| NM_003714 | STC2          | -1,44        | -1,48        | 1,72   | 2,39   | 2,118                | <b>2,06</b>          |
| NM_156036 | HOXB6         | -1,42        | -1,47        | 2,54   | 1,57   | 2,13                 | <b>2,05</b>          |
| NM_016639 | TNFRSF12A     | -1,57        | -2,75        | 1,51   | 2,59   | 3,596                | <b>2,05</b>          |
| NM_003257 | TJP1          | -1,44        | -1,73        | 1,78   | 2,29   | 2,431                | <b>2,03</b>          |
| NM_001731 | BTG1          | -1,42        | -1,66        | 2,31   | 1,70   | 2,343                | <b>2,00</b>          |
| NM_018420 | SLC22A15      | -1,59        | -1,91        | 2,23   | 1,72   | 2,375                | <b>1,98</b>          |
| NM_005801 | SUI1          | -2,08        | -2,97        | 2,05   | 1,87   | 2,796                | <b>1,96</b>          |
| BC028704  | ARRDC4        | -1,37        | -1,70        | 2,14   | 1,77   | 2,42                 | <b>1,96</b>          |
| NM_152829 | TES           | -1,69        | -1,63        | 1,71   | 2,19   | 1,884                | <b>1,95</b>          |
| NM_130469 | JDP2          | -1,67        | -1,50        | 1,85   | 2,02   | 1,744                | <b>1,93</b>          |
| NM_007052 | NOX1          | -1,31        | -1,39        | 1,59   | 2,24   | 2,034                | <b>1,92</b>          |
| D86962    | GRB10         | -1,68        | -1,44        | 1,93   | 1,91   | 1,653                | <b>1,92</b>          |

|            |           |       |       |      |      |       |             |
|------------|-----------|-------|-------|------|------|-------|-------------|
| AL833530   | NFE2L1    | -1,38 | -1,79 | 1,89 | 1,94 | 2,49  | <b>1,91</b> |
| NM_003729  | RTCD1     | -1,76 | -2,26 | 2,05 | 1,73 | 2,416 | <b>1,89</b> |
| AB051487   | DUSP16    | -1,72 | -2,01 | 1,65 | 2,11 | 2,192 | <b>1,88</b> |
| NM_203472  | SELS      | -1,32 | -1,72 | 2,06 | 1,67 | 2,425 | <b>1,87</b> |
| NM_032705  | MGC14801  | -1,46 | -1,56 | 1,96 | 1,72 | 1,966 | <b>1,84</b> |
| THC1854890 | LOC400782 | -1,36 | -1,95 | 1,96 | 1,69 | 2,628 | <b>1,83</b> |
| NM_152680  | FLJ32028  | -1,52 | -1,44 | 1,59 | 2,03 | 1,717 | <b>1,81</b> |
| NM_024921  | POF1B     | -1,51 | -1,73 | 1,62 | 2,00 | 2,071 | <b>1,81</b> |
| NM_003212  | TDGF1     | -4,55 | -1,65 | 2,15 | 1,36 | 0,636 | <b>1,76</b> |
| NM_030674  | SLC38A1   | -1,37 | -1,63 | 1,79 | 1,72 | 2,1   | <b>1,76</b> |
| AK096099   | LOC90288  | -1,48 | -1,40 | 2,12 | 1,39 | 1,654 | <b>1,76</b> |
| NM_007214  | SEC63     | -1,46 | -1,59 | 2,02 | 1,48 | 1,91  | <b>1,75</b> |
| AB028948   | THRAP2    | -1,38 | -1,88 | 1,99 | 1,51 | 2,386 | <b>1,75</b> |
| BC012895   | SLC7A1    | -1,32 | -1,39 | 1,58 | 1,74 | 1,745 | <b>1,66</b> |
| AB082526   | NEK9      | -1,37 | -1,32 | 1,78 | 1,52 | 1,585 | <b>1,65</b> |
| NM_173576  | C10orf48  | -1,80 | -1,45 | 1,77 | 1,52 | 1,327 | <b>1,64</b> |
| NM_152429  | C10orf13  | -1,81 | -1,65 | 1,72 | 1,56 | 1,499 | <b>1,64</b> |
| AL833957   | SETDB2    | -1,32 | -1,37 | 1,55 | 1,70 | 1,693 | <b>1,63</b> |
| NM_032593  | HINT2     | -1,51 | -1,35 | 1,71 | 1,42 | 1,395 | <b>1,56</b> |
| NM_004071  | CLK1      | -1,41 | -1,45 | 1,57 | 1,54 | 1,6   | <b>1,56</b> |
| AK024274   | SCYL2     | -1,40 | -1,75 | 1,48 | 1,63 | 1,946 | <b>1,55</b> |
| U92014     | SEC31L1   | -1,34 | -1,61 | 1,44 | 1,67 | 1,87  | <b>1,55</b> |
| NM_004064  | CDKN1B    | -1,70 | -1,77 | 1,50 | 1,58 | 1,602 | <b>1,54</b> |
| NM_019022  | TXNDC10   | -1,68 | -1,66 | 1,74 | 1,33 | 1,516 | <b>1,53</b> |
| AK056882   | RASEF     | -1,49 | -1,37 | 1,54 | 1,51 | 1,406 | <b>1,53</b> |
| NM_152283  | ZFP62     | -2,56 | -1,38 | 1,38 | 1,65 | 0,817 | <b>1,52</b> |
| NM_015630  | EPC2      | -1,82 | -1,58 | 1,31 | 1,72 | 1,315 | <b>1,51</b> |
| NM_016106  | SCFD1     | -1,58 | -1,74 | 1,56 | 1,46 | 1,661 | <b>1,51</b> |
| NM_052965  | C1orf19   | -1,93 | -1,34 | 1,41 | 1,60 | 1,049 | <b>1,51</b> |
| NM_016628  | WAC       | -1,39 | -1,90 | 1,35 | 1,65 | 2,052 | <b>1,50</b> |
| BC000024   | C12orf14  | -1,39 | -1,49 | 1,64 | 1,33 | 1,596 | <b>1,49</b> |
| NM_002835  | PTPN12    | -1,35 | -1,68 | 1,51 | 1,45 | 1,841 | <b>1,48</b> |
| NM_002009  | FGF7      | -1,44 | -1,40 | 1,56 | 1,40 | 1,433 | <b>1,48</b> |
| NM_006756  | TCEA1     | -1,55 | -1,95 | 1,70 | 1,25 | 1,853 | <b>1,47</b> |
| X78926     | ZNF268    | -1,72 | -1,35 | 1,32 | 1,62 | 1,15  | <b>1,47</b> |
| NM_001239  | CCNH      | -1,42 | -1,51 | 1,36 | 1,57 | 1,551 | <b>1,46</b> |
| U39064     | MAP2K6    | -1,52 | -1,44 | 1,52 | 1,39 | 1,386 | <b>1,46</b> |
| NM_018359  | FLJ11200  | -1,36 | -1,58 | 1,63 | 1,28 | 1,691 | <b>1,45</b> |
| NM_003655  | CBX4      | -1,32 | -1,31 | 1,45 | 1,46 | 1,445 | <b>1,45</b> |
| AK056096   | C9orf10OS | -1,80 | -1,62 | 1,37 | 1,53 | 1,305 | <b>1,45</b> |
| NM_013438  | UBQLN1    | -1,46 | -1,57 | 1,29 | 1,62 | 1,566 | <b>1,45</b> |
| NM_080632  | UPF3B     | -1,64 | -1,61 | 1,31 | 1,58 | 1,413 | <b>1,44</b> |
| NM_174908  | C3orf6    | -1,31 | -1,42 | 1,31 | 1,57 | 1,558 | <b>1,44</b> |
| NM_005324  | H3F3B     | -2,00 | -2,47 | 1,48 | 1,40 | 1,772 | <b>1,44</b> |
| AB051540   | ZC3HDC5   | -1,42 | -1,42 | 1,41 | 1,45 | 1,434 | <b>1,43</b> |
| NM_005843  | STAM2     | -1,33 | -1,37 | 1,39 | 1,47 | 1,477 | <b>1,43</b> |
| AK027341   | KIAA1856  | -2,04 | -2,22 | 1,48 | 1,38 | 1,557 | <b>1,43</b> |
| NM_002669  | PLRG1     | -1,52 | -1,44 | 1,60 | 1,23 | 1,34  | <b>1,42</b> |
| D87077     | KIAA0240  | -1,51 | -1,43 | 1,52 | 1,31 | 1,335 | <b>1,42</b> |

|           |              |       |       |      |      |       |             |
|-----------|--------------|-------|-------|------|------|-------|-------------|
| NM_003122 | SPINK1       | -1,67 | -2,03 | 1,44 | 1,39 | 1,712 | <b>1,41</b> |
| NM_016304 | C15orf15     | -1,45 | -1,42 | 1,56 | 1,26 | 1,376 | <b>1,41</b> |
| NM_080820 | HARS2        | -1,88 | -1,75 | 1,57 | 1,25 | 1,312 | <b>1,41</b> |
| NM_139169 | TRUB1        | -1,66 | -1,52 | 1,33 | 1,47 | 1,28  | <b>1,40</b> |
| NM_003533 | HIST1H3I     | -1,59 | -2,30 | 1,46 | 1,32 | 2,007 | <b>1,39</b> |
| AL512717  | DKFZp547E052 | -1,48 | -1,36 | 1,37 | 1,40 | 1,267 | <b>1,38</b> |
| NM_021059 | H3/o         | -1,59 | -2,28 | 1,46 | 1,29 | 1,984 | <b>1,38</b> |
| NM_003537 | HIST1H3B     | -1,68 | -2,35 | 1,39 | 1,34 | 1,912 | <b>1,37</b> |
| NM_000346 | SOX9         | -2,32 | -1,94 | 1,43 | 1,30 | 1,142 | <b>1,37</b> |
| NM_144591 | C10orf32     | -2,06 | -1,30 | 1,25 | 1,49 | 0,861 | <b>1,37</b> |
| NM_014169 | C14orf123    | -1,41 | -1,38 | 1,41 | 1,32 | 1,336 | <b>1,36</b> |
| NM_022893 | BCL11A       | -2,29 | -1,98 | 1,45 | 1,27 | 1,178 | <b>1,36</b> |
| NM_003758 | EIF3S1       | -1,72 | -1,50 | 1,47 | 1,24 | 1,182 | <b>1,36</b> |
| NM_003534 | HIST1H3G     | -1,53 | -2,11 | 1,40 | 1,31 | 1,871 | <b>1,35</b> |
| NM_001904 | CTNNB1       | -1,72 | -1,46 | 1,33 | 1,36 | 1,146 | <b>1,35</b> |
| NM_016444 | ZNF226       | -1,42 | -1,43 | 1,21 | 1,48 | 1,352 | <b>1,34</b> |
| NM_001730 | KLF5         | -1,64 | -1,73 | 1,35 | 1,33 | 1,416 | <b>1,34</b> |
| NM_001386 | DPYSL2       | -1,54 | -1,69 | 1,28 | 1,40 | 1,47  | <b>1,34</b> |
| NM_014432 | IL20RA       | -1,88 | -1,45 | 1,47 | 1,17 | 1,014 | <b>1,32</b> |
| AB011134  | KIAA0562     | -1,58 | -1,31 | 1,42 | 1,20 | 1,087 | <b>1,31</b> |
| BC017665  | CXorf39      | -2,19 | -2,14 | 1,22 | 1,39 | 1,276 | <b>1,31</b> |
| AF107457  | HLXB9        | -1,39 | -1,64 | 1,30 | 1,31 | 1,535 | <b>1,30</b> |
| NM_004557 | NOTCH4       | -1,41 | -1,34 | 1,19 | 1,41 | 1,241 | <b>1,30</b> |
| NM_014153 | ZC3HDC7      | -1,37 | -1,60 | 1,39 | 1,21 | 1,521 | <b>1,30</b> |
