# Supplementary material
Source: PubMed Central journal article supplement (PMC2669348)
Supplement: 0813221106_ST4_PDF.pdf [file 0813221106_ST4_PDF.pdf]

**TABLE S4.** Sequences identified with the *Genomatix* software as RBP- or TCF-binding consensus in the different promoters. The underlined sequence corresponds to the core of the motif

| Gene    | RBP consensus              | Position from-to |
|---------|----------------------------|------------------|
| EphB3   | ACAAT <u>TGGG</u> GAGATTG  | -2074 / -2088    |
|         | CTAACTTCTCACTCT            | -1721 / -1735    |
| NOX1    | ACAAT <u>TGGG</u> AAACTGG  | +204 / +218      |
| SOX9    | AGAG <u>TTTCC</u> CAATGC   | -1684 / -1698    |
| KLF5    | TGTGT <u>TGGG</u> AAAACGT  | -705 / -719      |
|         | GGAG <u>TGGG</u> AAAAACC   | -670 / -684      |
| Hes1    | ACTGT <u>TGGG</u> AAAGAAA  | -74 / -88        |
|         | GGAAG <u>TTTCA</u> CACGA   | -54 / -68        |
| Gene    | TCF consensus              | Position from-to |
| Jagged1 | CACCCTT <u>CAA</u> AGGAAGT | -1100 / -1126    |
|         | AGTTTTT <u>CAA</u> AGTTCCC | -558 / -574      |
